# Supplementary material
Source: Springer Nature journal article supplement (http://www.springermedizin.de/resource/supplementary/12933_2013_724_MOESM3_ESM.pdf/9538832)

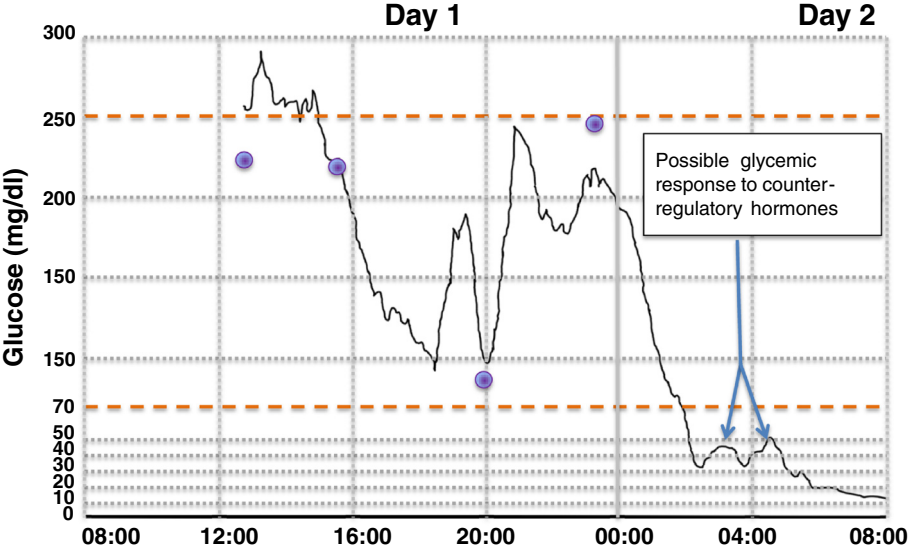

Patient actions (as recovered from CGMS and insulin pump):

Correction Boluses

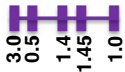

Units

Exercise

Patient's meals

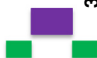

Supplement: MOESM3 [file 9538832]
